# Supplementary material for: Hollow nitrogen-doped carbon spheres as efficient and durable electrocatalysts for oxygen reduction
Source: Royal Society of Chemistry journal article supplement (doi:10.1039/c4cc03437f), 2014-01-01
Supplement: c4cc03437f1.pdf [file c4cc03437f1.pdf]

## **Electronic Supplementary Information (ESI†)**

### **Hollow nitrogen-doped carbon spheres as an efficient and durable electrocatalyst for oxygen reduction**

Jakkid Sanetuntikul <sup>a</sup>, Tao Hang <sup>b,\*</sup>, and Sangaraju Shanmugam <sup>a,\*</sup>

<sup>a</sup> Department of Energy Systems Engineering,  
Daegu Gyeongbuk Institute of Science & Technology (DGIST),  
Dalseong-gun, Daegu 711-873, Korea.

<sup>b</sup> School of Material Science and Engineering,  
State Key Laboratory of Metal Matrix Composites,  
Shanghai Jiao Tong University, Shanghai, 200-240, PR China.

E-mails: sangarajus@dgist.ac.kr (S.S);

hangtao@sjtu.edu.cn (T.H)

## **Synthesis of Hollow nitrogen-doped carbon spheres (HNCS)**

Iron (III) diethylene triaminepentaacetate (Fe-DTPA) is used as a solid precursor for carbon, nitrogen and iron, was carried out by using Swagelok union cells. Fe-DTPA (0.6 g) was filled into the cell at room temperature. The cell was closed and then placed at the center of the muffle furnace. The temperature was raised at a heating rate of 10 °C per minute up to a required temperature (700 °C and 900 °C), and held for 1 h. The reaction took place under the autogenic pressure of the precursor. The closed cell was gradually cooled down to room temperature. The yield of products obtained at 700 °C and 900 °C are found to be 35 and 30 wt%, respect to the weight of initial precursor. As-synthesized product (100 mg), oxide/metal filled carbon was stirred in 5 mL of concentrated HCl for 24 h to remove the oxide/metal core. The HNCS were recovered by centrifuging the contents at 10,000 rpm for 7 min for several times using water and ethanol. The black compound was washed with copious waters, and ethanol at last, and stored under vacuum overnight.

### **Characterization:**

The morphology of the samples was observed using a field-emission scanning electron microscope (FE-SEM, Hitachi, S-4800 II) with an accelerating voltage of 3 kV. Before the SEM observation, the samples were coated with osmium. The microstructures and lattice fringe of samples were determined by field-emission transmission electron microscope (FE-TEM, Hitachi, HF-3300) with an acceleration voltage of 300 kV. For TEM analysis, samples were ultrasonically dispersed in ethanol, and then a drop of dispersion was deposited on copper grid and dry under UV lamp. The crystal structure of samples was investigated by powder X-ray diffraction (XRD, Panalytical Empyrean) using Cu K $\alpha$  radiation at a generator voltage of 40 kV and a tube current of 30 mA. Elemental analysis was performed by X-ray photoelectron spectroscopy (XPS, Thermo Fisher Scientific, ESCALAB250 XPS system, Theta Probe XPS system) using monochromated Al K-alpha source at 15 kV and 150 W. Binding energy values at x-axis were calibrated by using C 1s

from a carbon value taken as 284.6 eV. The amount of nitrogen and carbon in samples were accurately determined by elemental analyzer (C, H, N analysis).

### **Electrochemical oxygen reduction:**

Electrochemical tests were carried out by rotating-disc-electrode (RDE) and rotating ring-disk electrode (RRDE) (Biologic, VSP). A 3-electrode system cell consisting of the glassy carbon, Pt wire and standard caramel electrode (SCE) act as working electrode, counter and reference electrodes, respectively. The catalyst ink for electrochemical measurements was fabricated by dispersing 5 mg of the catalyst in 250  $\mu\text{L}$  isopropyl alcohol and 5  $\mu\text{L}$  of Nafion (5%) by ultrasonication for 30 min to obtained homogenous ink. From this, the catalyst ink was coated on clean glassy carbon electrode surface with catalyst loading 0.5  $\text{mg cm}^{-2}$  and 0.4  $\text{mg cm}^{-2}$  for RDE and RRDE experiment, respectively. Then the solvent was naturally evaporated at room temperature. The oxygen reduction activities were measured by hydrodynamic voltammetry in an  $\text{O}_2$ -saturated 0.1 M KOH at room temperature. For RDE and RRDE, GC electrodes using 3 and 4 mm-diameter glassy carbon disks, respectively. The electrolyte solution was purged with nitrogen gas for 30 min before the electrochemical measurement. A flow of  $\text{O}_2$  was maintained over the electrolyte during the measurement to ensure  $\text{O}_2$  atmosphere inside the cell. The electron transfer number from Koutecky-Levich plots were determined by follow equation.

$$\frac{1}{J} = \frac{1}{J_L} + \frac{1}{J_K} = \frac{1}{\frac{1}{B\omega^2} + J_K}$$

$$B = 0.62 n F C_0 D_0^{\frac{2}{3}} \nu^{-\frac{1}{6}}$$

Where, J is the experimentally measured current,  $J_L$  is the diffusion-limiting current,  $J_K$  is the kinetic current,  $\omega$  is the angular velocity, F is the Faraday constant,  $C_0$  is the saturated concentration of  $\text{O}_2$  in 0.1M KOH ( $1.2 \times 10^{-6} \text{ mol cm}^{-3}$ ),  $D_0$  is the diffusion coefficient of  $\text{O}_2$  in 0.1M KOH ( $1.9 \times 10^{-5} \text{ cm}^2 \text{ s}^{-1}$ ), and  $\nu$  is the kinematic viscosity of the electrolyte. The “n” can calculate from slop by under plot of  $J^{-1}$  vs  $\omega^{-1/2}$  and  $J_k$  is calculated from inverse of intercept.

The formation of HO<sub>2</sub><sup>-</sup> and the electron transfer number from RRDE experiment were determined by follow equation;

$$\text{H}_2\text{O}_2(\%) = 200 \times \frac{I_R / N}{I_D + (I_R / N)}$$

$$n = 4 \times \frac{I_D}{I_D + (I_R / N)}$$

where, I<sub>D</sub> is the disk current, I<sub>R</sub> is the ring current, and N is the ring correction coefficient in RRDE experiment was determine to be 0.37 from the reduction of Fe(CN)<sub>6</sub><sup>4-/3-</sup> redox couple. The ring potential was held at 1.3 vs. RHE. For comparison of electrocatalyst, reference Pt/C (10 wt%, Johnson-Matthey) was used.

### Calibration of SCE and conversion to RHE

The calibration of saturated Calomel electrode (SCE) reference electrode is performed in a standard three-electrode system. Pt wires were used as the working and counter electrodes, and the SCE as the reference electrode. Electrolytes are pre-purged and saturated with high purity H<sub>2</sub>. Linear scanning voltammetry (LSV) is then run at a scan rate of 10 mV/s, and the potential at which the current crossed zero is taken to be the thermodynamic potential (vs. SCE) for the hydrogen electrode reactions (Figure S1). All potential in the RHE scale were converted from the SCE scale using E (RHE) = E (SCE) + 0.991 V in 0.1 M KOH.

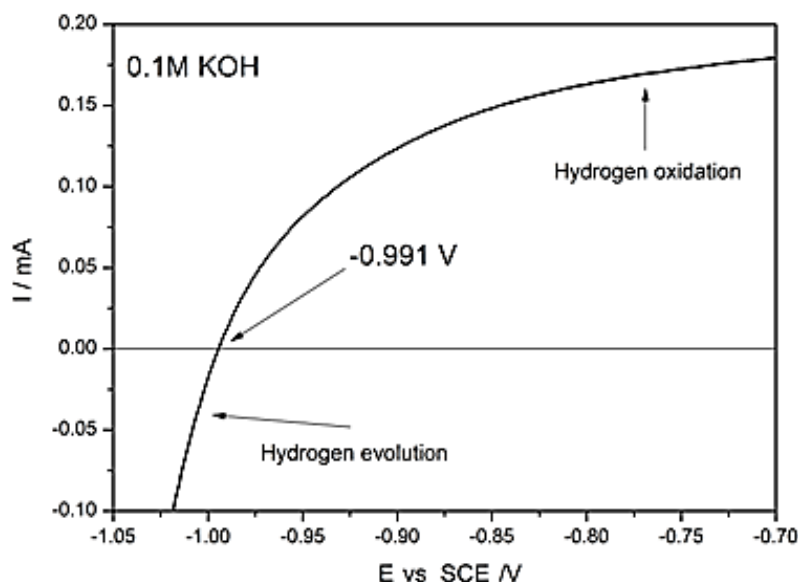

Fig. S1. Calibration of SCE to RHE

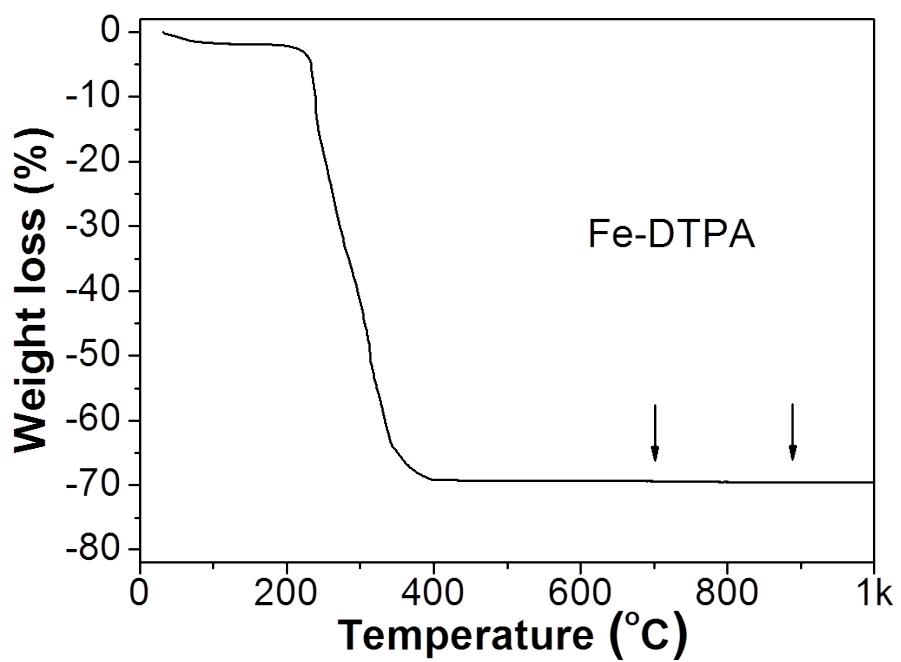

Fig. S2. Thermogram of Fe-DTPA precursor carried out in an air atmosphere with a heating rate of  $10\text{ }^{\circ}\text{C min}^{-1}$

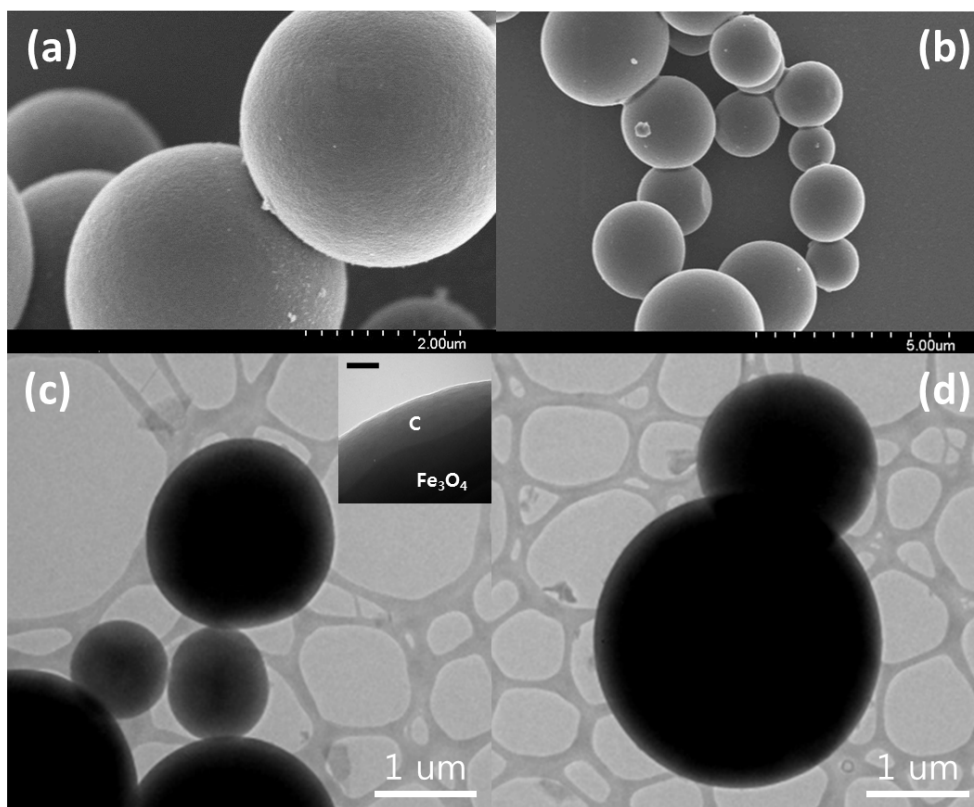

Fig. S3. Typical FESEM images of product obtained at (a) 700 °C (b) 900 °C and TEM images of (c) 700°C (d) 900°C.; inset in (c) shows TEM image of a sphere clearly depicts a thick carbon coating on Fe<sub>3</sub>O<sub>4</sub> core (scale bar : 50nm).

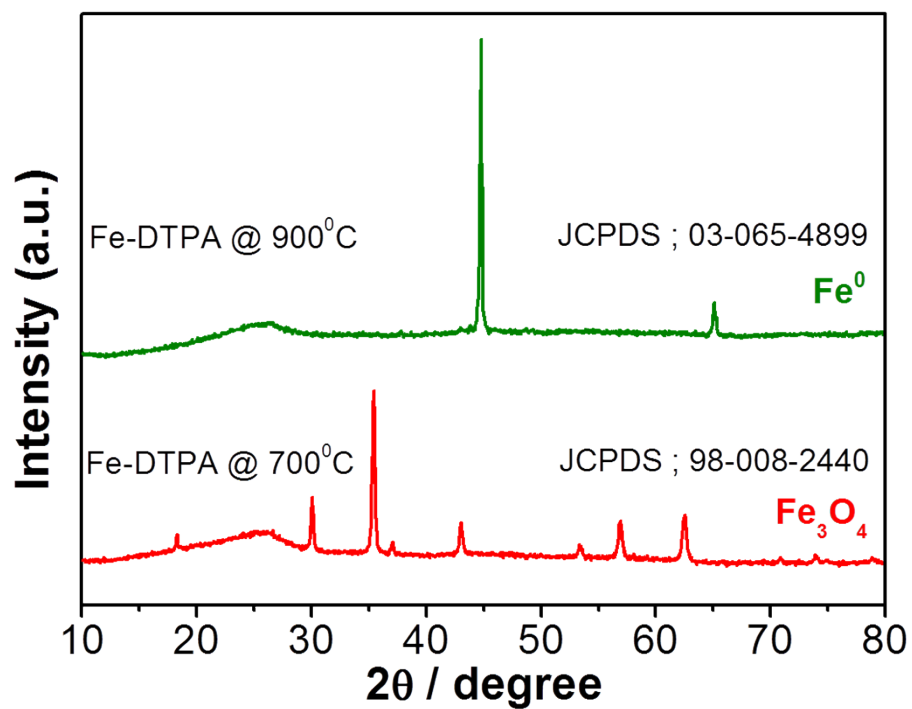

Fig. S4. XRD patterns of as-synthesized products prepared at 700 °C and 900 °C for 1h (before acid treatment)

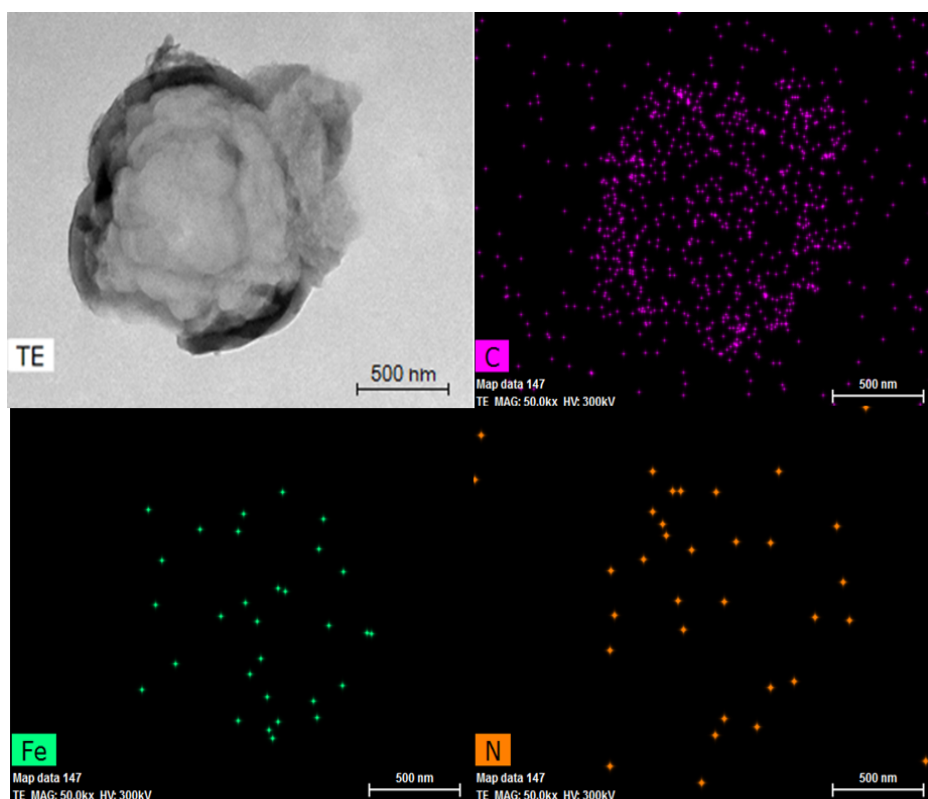

Fig. S5. The TEM image of HNCS71 and corresponding EDX mapping results for the elements  $C_{k\alpha}$ ,  $Fe_{k\alpha}$ , and  $N_{k\alpha}$

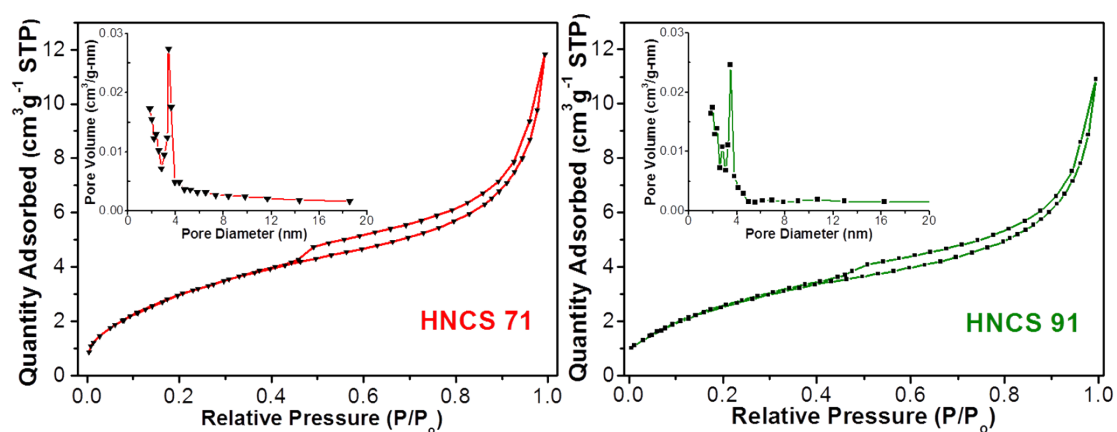

Fig. S6. BET surface area analysis of (a) HNCS71 (b) HNCS91 catalysts; insets show BJH pore-size distribution.



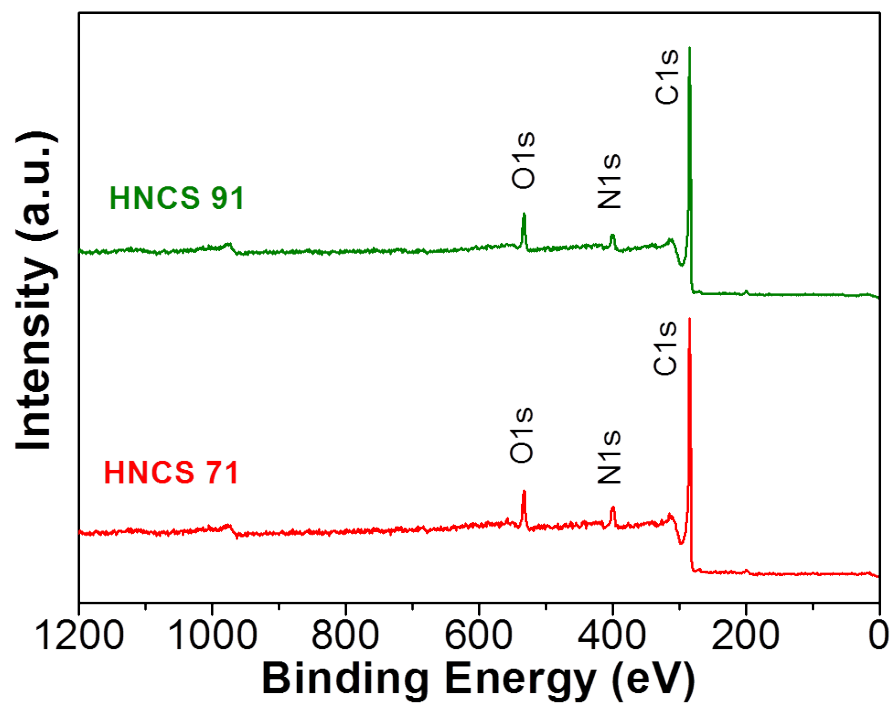

Fig. S7. XPS survey spectra of HNCSs

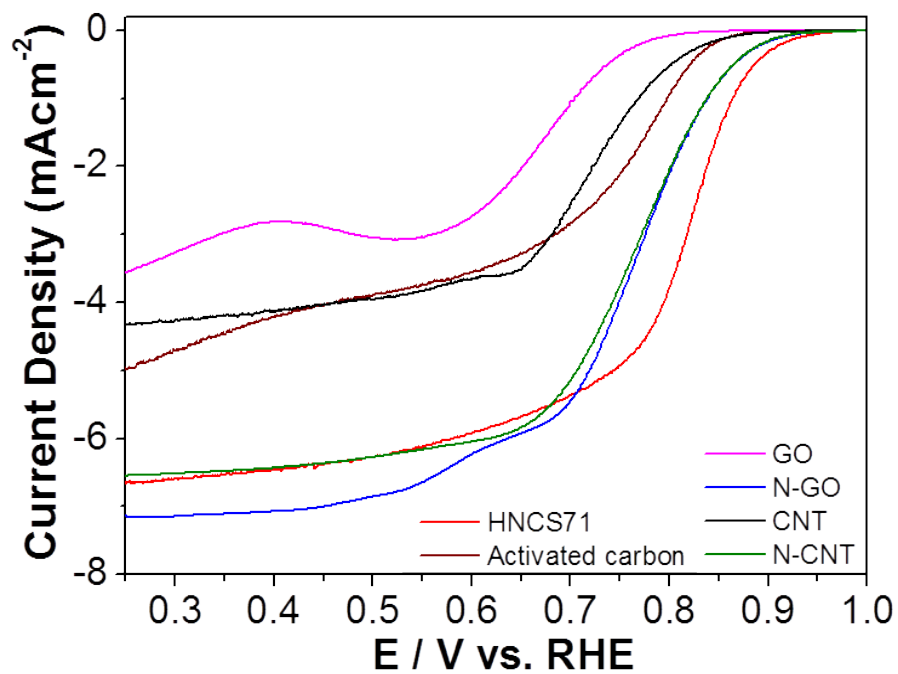

Fig. S8. RDE voltammograms of HNCS71, Activated carbon, GO, N-GO, CNT, and N-CNT catalysts obtained at 1600 rpm in O<sub>2</sub>-saturated 0.1 M KOH

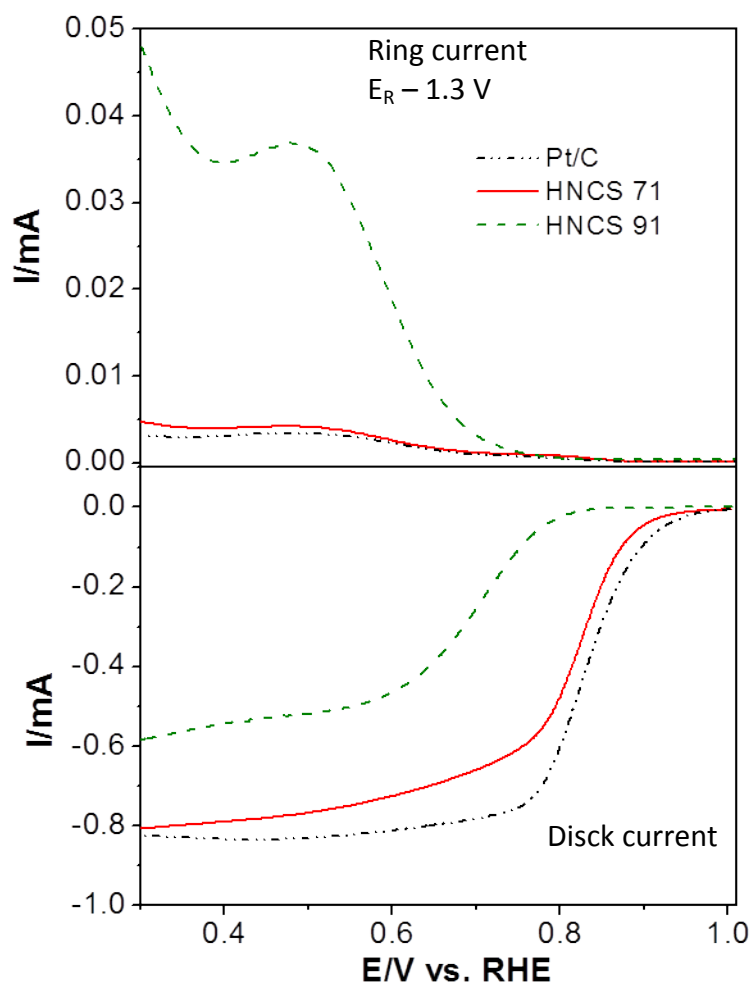

Fig. S9. RRDE response of HNCS71, HNCS91 and Pt/C catalysts obtained at 1600 rpm in  $\text{O}_2$ -saturated 0.1 M KOH. (HNCSs catalyst loading-  $0.4 \text{ mg cm}^{-2}$  ; Pt/C - $30 \text{ } \mu\text{g cm}^{-2}$  )

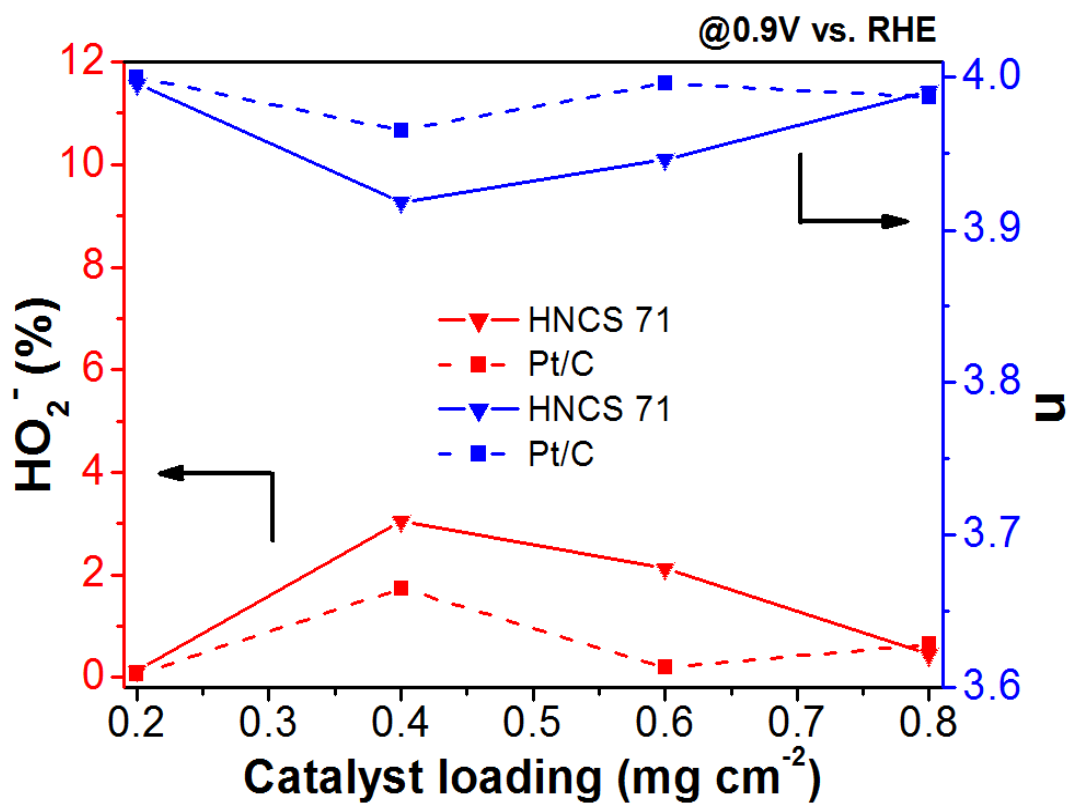

Fig. S10. The effect of catalyst loading on formation of peroxide and the electron transfer number of HNCS71 and Pt/C catalysts.

**Table S1.** The ORR data of the electrocatalysts derive from Fig. S8

| Catalyst materials       | Half-wave potential, $E_{1/2}$<br>(E/V vs. RHE) | Reference source |
|--------------------------|-------------------------------------------------|------------------|
| HNCS 71                  | 0.820                                           | **               |
| Activated carbon         | 0.755                                           | Sigma-Aldrich    |
| Graphene Oxide<br>(GO)   | 0.652                                           | **               |
| Carbon nanotube<br>(CNT) | 0.722                                           | Sigma-Aldrich    |
| N-GO                     | 0.770                                           | **               |
| N-CNT                    | 0.765                                           | **               |

\*\* Present study

**Table S2.** The physical and electrochemical properties of HNCS 71 and HNCS 91

| Catalyst                             | Surface area<br>(m <sup>2</sup> g <sup>-1</sup> ) <sup>(a)</sup> | no. of<br>Electron<br>Transfer | Nitrogen distribution<br>(%) |                |                |                | Total N<br>Content<br>(%) <sup>(b)</sup> | N/C<br>ratio |
|--------------------------------------|------------------------------------------------------------------|--------------------------------|------------------------------|----------------|----------------|----------------|------------------------------------------|--------------|
|                                      |                                                                  |                                | N <sub>1</sub>               | N <sub>2</sub> | N <sub>3</sub> | N <sub>4</sub> |                                          |              |
| <b>HNCS71</b>                        | 11.82                                                            | 3.90                           | 26.51                        | 4.19           | 59.09          | 9.76           | 10.4                                     | 0.13         |
| <b>HNCS91</b>                        | 10.79                                                            | 2.82                           | 15.71                        | 7.07           | 68.77          | 7.92           | 4.12                                     | 0.05         |
| <b>Pt/C<br/>(Johnson<br/>Mathew)</b> | -                                                                | 3.95                           | -                            | -              | -              | -              | -                                        | -            |

(a) Measured Brunauer-Emmett-Teller (BET)

(b) Measured by X-ray photoelectron spectroscopy (XPS)

**Table S3.** The CHN elemental analysis of HNCSs

| Catalyst      | C     | H   | N    | N/C ratio |
|---------------|-------|-----|------|-----------|
| <b>HNCS71</b> | 83.38 | 0.7 | 11.4 | 0.136     |
| <b>HNCS91</b> | 91.47 | 0.2 | 3.89 | 0.042     |
